# Supplementary material
Source: PubMed Central journal article supplement (PMC4060151)
Supplement: NIHMS580874-supplement-01.pdf [file NIHMS580874-supplement-01.pdf]

**This document includes:**

List of abbreviations

Supplementary figure S1, related to Figure 1

Supplementary figure S2, related to exact mass determination experimental procedure

Supplementary table S1, related to MS/MS sequencing experimental procedure

Supplementary table S2, related to NMR spectroscopy experimental procedure

Supplementary table S3, related to NMR spectroscopy experimental procedure

Supplementary table S4, related to NMR spectroscopy experimental procedure

Supplementary table S5, related to structure calculations experimental procedure

References

**List of abbreviations**

|            |                                             |
|------------|---------------------------------------------|
| C-terminus | carboxy terminus                            |
| FTICR      | Fourier transform ion cyclotron resonance   |
| HCN        | proton, carbon, nitrogen                    |
| MALDI      | matrix-assisted laser desorption/ionization |
| MS         | mass spectrometry                           |
| MS/MS      | tandem mass spectrometry                    |
| N-terminus | amino terminus                              |
| NanoESI    | nano-electrospray ionization                |
| NMR        | nuclear magnetic resonance                  |
| NOE        | nuclear Overhauser effect                   |
| Q-TOF      | quadrupole time of flight                   |
| rmsd       | root mean square deviation                  |
| TOF        | time of flight                              |

## Supplementary figures

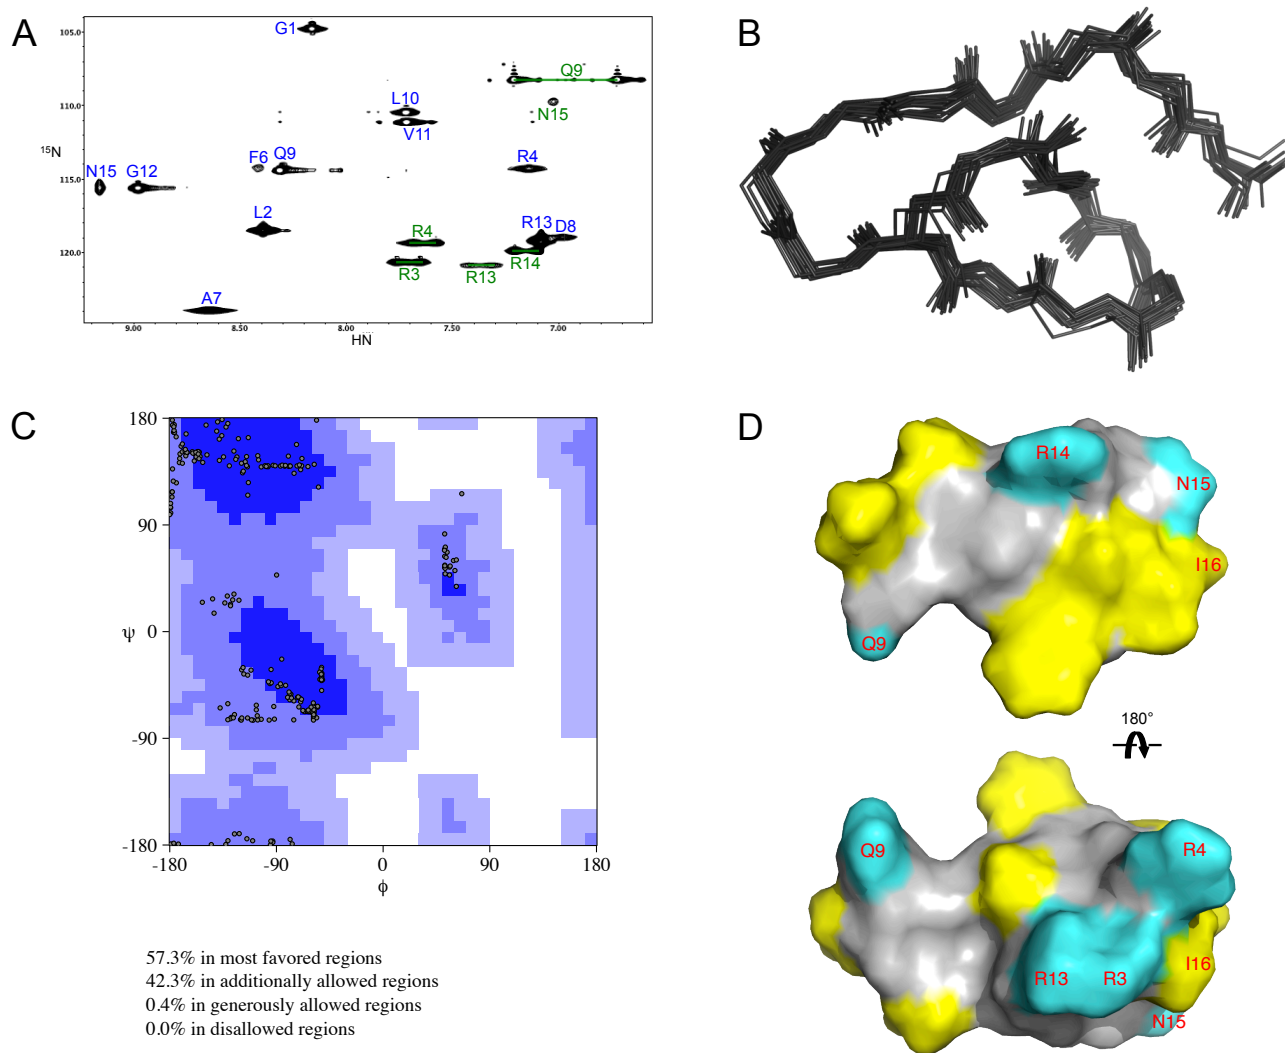

**Figure S1, related to Figure 1.** **A)** 2D- $[^1\text{H}-^{15}\text{N}]$ -HSQC spectrum of lassomycin. 12 backbone resonances are labeled in blue. Sidechain amide resonances are paired together with green lines and labeled in green. The second sidechain resonance for Asn15 (7.45 ppm) is not shown because of its extremely weak intensity. **B)** Backbone overlay of the 20 lowest energy conformers of lassomycin. **C)** Ramachandran plot of the dihedral angles ( $\phi$  versus  $\psi$ ) of the 20 best solution structures for lassomycin. **D)** Surface representation of lassomycin. Hydrophobic side chains are highlighted in yellow and hydrophilic side chains are shown in cyan. Hydrophilic residues and the C-terminal residue (Ile16) are labeled.

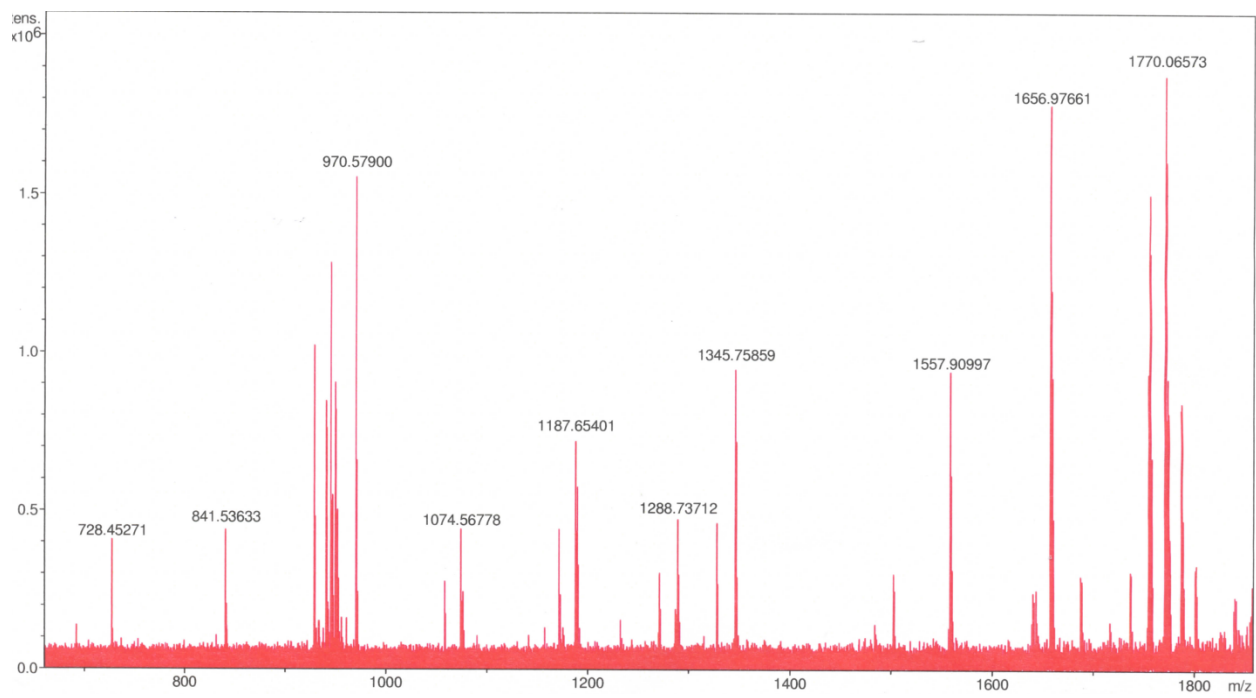

**Figure S2 related to exact mass determination. MALDI FTICR spectrum of lassomycin.**

## Supplementary tables

**Table S1 related to MS/MS sequencing.** MALDI FTICR and MALDI TOF/TOF analysis of partially hydrolyzed lassomycin.

| Amino acids<br>(X)                                            | Proposed<br>formula<br>[X+H] <sup>+</sup>                        | Calculated<br>mass<br>[X+H] <sup>+</sup> | Observed<br>mass<br>[X+H] <sup>+</sup> | Error<br>(ppm) |
|---------------------------------------------------------------|------------------------------------------------------------------|------------------------------------------|----------------------------------------|----------------|
| <b>Series 1</b> (ion series A & B)                            |                                                                  |                                          |                                        |                |
| ELVGRRNI-COOCH <sub>3</sub> <sup>a</sup>                      | C <sub>41</sub> H <sub>76</sub> N <sub>15</sub> O <sub>12</sub>  | 970.5792                                 | 970.5790 <sup>b</sup>                  | 0.3            |
| LVGRRNI-COOCH <sub>3</sub>                                    | C <sub>36</sub> H <sub>69</sub> N <sub>14</sub> O <sub>9</sub>   | 841.5367                                 | 841.5363                               | 0.4            |
| VGRRNI-COOCH <sub>3</sub>                                     | C <sub>30</sub> H <sub>58</sub> N <sub>13</sub> O <sub>8</sub>   | 728.4526                                 | 728.4527                               | -0.2           |
| GRRNI-COOCH <sub>3</sub>                                      | C <sub>25</sub> H <sub>49</sub> N <sub>12</sub> O <sub>7</sub>   | 629.3842                                 | 629.3841                               | 0.1            |
| RRNI-COOCH <sub>3</sub>                                       | C <sub>23</sub> H <sub>46</sub> N <sub>11</sub> O <sub>6</sub>   | 572.3627                                 | 572 <sup>c</sup>                       | –              |
| RNI-COOCH <sub>3</sub>                                        | C <sub>17</sub> H <sub>34</sub> N <sub>7</sub> O <sub>5</sub>    | 416.2616                                 | 416 <sup>c</sup>                       | –              |
| <b>Series 2</b> (ion series C)                                |                                                                  |                                          |                                        |                |
| GLRRLFAD                                                      | C <sub>42</sub> H <sub>69</sub> N <sub>14</sub> O <sub>10</sub>  | 929.5316                                 | 929.5316                               | 0.0            |
| GLRRLFAD+H <sub>2</sub> O                                     | C <sub>42</sub> H <sub>71</sub> N <sub>14</sub> O <sub>11</sub>  | 947.5421                                 | 947.5424                               | -0.3           |
| GLRRLFAD <sup>E</sup> <sup>a</sup>                            | C <sub>47</sub> H <sub>78</sub> N <sub>15</sub> O <sub>14</sub>  | 1076.5847                                | 1076.5840                              | 0.7            |
| GLRRLFAD <sup>EL</sup>                                        | C <sub>53</sub> H <sub>89</sub> N <sub>16</sub> O <sub>15</sub>  | 1189.6688                                | 1189.6691                              | -0.2           |
| GLRRLFAD <sup>ELV</sup>                                       | C <sub>58</sub> H <sub>98</sub> N <sub>17</sub> O <sub>16</sub>  | 1288.7372                                | 1288.7371                              | 0.1            |
| GLRRLFAD <sup>ELVG</sup>                                      | C <sub>60</sub> H <sub>101</sub> N <sub>18</sub> O <sub>17</sub> | 1345.7587                                | 1345.7586                              | 0.1            |
| GLRRLFAD <sup>ELVGR</sup>                                     | C <sub>66</sub> H <sub>113</sub> N <sub>22</sub> O <sub>18</sub> | 1501.8598                                | 1501.8578                              | 1.3            |
| <b>Series 3</b> (ion series D)                                |                                                                  |                                          |                                        |                |
| M+H <sub>2</sub> O with loss E-L-V <sup>a</sup>               | C <sub>67</sub> H <sub>117</sub> N <sub>26</sub> O <sub>17</sub> | 1557.9085                                | 1557.9100                              | -1.0           |
| M+H <sub>2</sub> O with loss E-L                              | C <sub>72</sub> H <sub>126</sub> N <sub>27</sub> O <sub>18</sub> | 1656.9769                                | 1656.9766                              | 0.2            |
| M+H <sub>2</sub> O with loss E                                | C <sub>78</sub> H <sub>137</sub> N <sub>28</sub> O <sub>19</sub> | 1770.0609                                | 1770.0657                              | -2.7           |
| <b>1-16 (molecular ion)</b>                                   |                                                                  |                                          |                                        |                |
| GLRRLFAD <sup>QLVGRRNI-COOCH<sub>3</sub></sup>                | C <sub>83</sub> H <sub>143</sub> N <sub>30</sub> O <sub>20</sub> | 1880.1089                                | 1880.1079                              | 0.5            |
| GLRRLFAD <sup>ELVGRRNI-COOCH<sub>3</sub></sup> <sup>a</sup>   | C <sub>83</sub> H <sub>142</sub> N <sub>29</sub> O <sub>21</sub> | 1881.0930                                | 1881.0914                              | 0.9            |
| GLRRLFAD <sup>ELVGRRNI-COOCH<sub>3</sub>+H<sub>2</sub>O</sup> | C <sub>83</sub> H <sub>144</sub> N <sub>29</sub> O <sub>22</sub> | 1899.1035                                | 1899.1044                              | -0.5           |

<sup>a</sup>De-amidation during acid hydrolysis converted Q to E

<sup>b</sup>Exact masses measured on MALDI FTICR MS

<sup>c</sup>Observed in MALDI TOF/TOF MS/MS but not in MS mode on FTICR MS

**Table S2 related to NMR spectroscopy.** Experimental parameters used to acquire NMR spectra on [<sup>13</sup>C, <sup>15</sup>N]lassomycin to obtain chemical shift assignments, coupling constants, and NOE restraints.

| Exp. Name <sup>a</sup>      | Nuclei <sup>b</sup>                                           | x-sw <sup>c</sup> | y-sw  | z-sw  | x-pts | y-pts | z-pts | References                                                                               |
|-----------------------------|---------------------------------------------------------------|-------------------|-------|-------|-------|-------|-------|------------------------------------------------------------------------------------------|
| <sup>13</sup> C-HSQC (full) | <sup>1</sup> H, <sup>13</sup> C                               | 11990             | 28155 |       | 1024  | 128   |       |                                                                                          |
| <sup>15</sup> N-HSQC        | <sup>1</sup> H, <sup>15</sup> N                               | 11990             | 2800  |       | 1024  | 128   |       | (Kay et al., 1992)                                                                       |
| HNHA                        | <sup>1</sup> H, <sup>1</sup> H <sub>n</sub> , <sup>15</sup> N | 11990             | 8000  | 1945  | 1024  | 96    | 32    | (Kuboniwa et al., 1994; Vuister and Bax, 1993)                                           |
| CBCA(CO)NH                  | <sup>1</sup> H, <sup>13</sup> C, <sup>15</sup> N              | 11990             | 12000 | 1945  | 1024  | 64    | 32    | (Muhandiram and Kay, 1994)                                                               |
| HCCH-TOCSY                  | <sup>1</sup> H, <sup>1</sup> H, <sup>13</sup> C               | 11990             | 9000  | 12001 | 1024  | 144   | 28    | (Sattler et al., 1995)                                                                   |
| HNCO                        | <sup>1</sup> H, <sup>13</sup> C(O), <sup>15</sup> N           | 11990             | 3770  | 1945  | 1024  | 64    | 32    | (Grzesiek and Bax, 1992; Ikura et al., 1990; Kay et al., 1994; Muhandiram and Kay, 1994) |
| HNCACB                      | <sup>1</sup> H, <sup>13</sup> C, <sup>15</sup> N              | 11990             | 16089 | 1945  | 1024  | 64    | 32    | (Kay et al., 1994; Muhandiram and Kay, 1994; Wittekind and Mueller, 1993)                |
| <sup>13</sup> C-NOESYHSQC   | <sup>1</sup> H, <sup>1</sup> H, <sup>13</sup> C               | 11990             | 8000  | 8000  | 1024  | 128   | 32    | (Farrow et al., 1994)                                                                    |
| <sup>15</sup> N-NOESYHSQC   | <sup>1</sup> H, <sup>1</sup> H, <sup>15</sup> N               | 11990             | 7998  | 1945  | 1024  | 128   | 32    | (Zhang et al., 1994)                                                                     |
| <sup>15</sup> N-TOCSYHSQC   | <sup>1</sup> H, <sup>1</sup> H, <sup>15</sup> N               | 11990             | 8000  | 1945  | 1024  | 128   | 32    | (Zhang et al., 1994)                                                                     |

<sup>a</sup>Experiments were acquired at 800 MHz.

<sup>b</sup>The nucleus acquired in each dimension (e.g. 1H,15N indicates hydrogen x, nitrogen y).

<sup>c</sup>x,y,z-pts and sw are the number of complex points and sweep width in each respective dimension (x is the directly detected dimension).

**Table S3 related to NMR spectroscopy.** <sup>1</sup>H Chemical shift assignments of lassomycin.

|                           | HN              | H $\alpha$ | H $\beta$  | others                                                                                                                            |
|---------------------------|-----------------|------------|------------|-----------------------------------------------------------------------------------------------------------------------------------|
| <b>Gly 1</b>              | 8.16            | 4.79, 3.36 |            |                                                                                                                                   |
| <b>Leu 2</b>              | 8.39            | 4.53       | 1.88, 1.36 | $\gamma$ CH 1.59, $\delta$ CH <sub>3</sub> 0.87, 0.85                                                                             |
| <b>Arg 3</b>              | NA <sup>a</sup> | 4.48       | 1.52, 1.19 | $\gamma$ CH <sub>2</sub> 1.21, 1.17, $\delta$ CH <sub>2</sub> 3.17, 2.88, $\eta$ <sub>2</sub> NH <sub>2</sub> 7.76, 7.66          |
| <b>Arg 4</b>              | 7.14            | 4.40       | 1.66, 1.54 | $\gamma$ CH <sub>2</sub> 1.44, 1.34, $\delta$ CH <sub>2</sub> 3.02, $\eta$ <sub>2</sub> NH <sub>2</sub> 7.69, 7.58                |
| <b>Leu 5</b>              | NA              | 4.41       | 1.10, 0.81 | $\gamma$ CH 1.03, $\delta$ CH <sub>3</sub> 0.67, 0.61                                                                             |
| <b>Phe 6</b>              | 8.41            | 3.98       | 3.64, 3.03 |                                                                                                                                   |
| <b>Ala 7</b>              | 8.65            | 4.25       | 1.38       |                                                                                                                                   |
| <b>Asp 8</b>              | 6.98            | 4.65       | 2.95, 1.88 |                                                                                                                                   |
| <b>Gln 9</b>              | 8.32            | 3.59       | 1.80, 1.65 | $\gamma$ CH <sub>2</sub> 2.15, 2.10, $\epsilon$ NH <sub>2</sub> 7.21, 6.73                                                        |
| <b>Leu 10</b>             | 7.72            | 4.40       | 1.61, 1.38 | $\gamma$ CH 1.40, $\delta$ CH <sub>3</sub> 0.86, 0.83                                                                             |
| <b>Val 11</b>             | 7.72            | 4.39       | 1.87       | $\gamma$ CH <sub>3</sub> 0.83, 0.83                                                                                               |
| <b>Gly 12</b>             | 8.98            | 5.39, 3.56 |            |                                                                                                                                   |
| <b>Arg 13</b>             | 7.08            | 5.17       | 1.20, 1.06 | $\gamma$ CH <sub>2</sub> 1.25, 1.13, $\delta$ CH <sub>2</sub> 2.85, 2.68, $\eta$ <sub>2</sub> NH <sub>2</sub> 7.42, 7.32          |
| <b>Arg 14</b>             | NA              | NA         | 1.80, 1.54 | $\gamma$ CH <sub>2</sub> 1.51, $\delta$ CH <sub>2</sub> 3.09, 2.99, $\eta$ <sub>2</sub> NH <sub>2</sub> 7.20, 7.10                |
| <b>Asn 15</b>             | 9.16            | 5.32       | 2.69       | $\delta$ NH <sub>2</sub> 7.47, 7.03                                                                                               |
| <b>Ile 16<sup>b</sup></b> | NA              | 4.07       | 1.77       | $\gamma$ CH <sub>2</sub> 1.44, 1.23 $\gamma$ CH <sub>3</sub> 0.89, $\delta$ CH <sub>3</sub> 0.86, $\epsilon$ CH <sub>3</sub> 3.55 |

<sup>a</sup>NA = not assigned. Due to spectral overlap, a chemical shift could not be definitively assigned to the HA of Arg 14 and the HN proton of Arg3, Leu5, Arg14 or Ile16. <sup>b</sup>Carboxy group of Ile is methylated ( $\epsilon$ CH<sub>3</sub>).

**Table S4 related to NMR spectroscopy.** Nitrogen and carbon chemical shift assignments of lassomycin

|                           | N               | C $\alpha$ | C $\beta$ | others                                                                    |
|---------------------------|-----------------|------------|-----------|---------------------------------------------------------------------------|
| <b>Gly 1</b>              | 104.75          | 45.02      |           |                                                                           |
| <b>Leu 2</b>              | 118.46          | 53.33      | 43.05     | C $\gamma$ 27.28, C $\delta$ 26.05, 24.92                                 |
| <b>Arg 3</b>              | NA <sup>a</sup> | 54.50      | 28.52     | C $\delta$ 43.90, N $\eta_2$ 110.11                                       |
| <b>Arg 4</b>              | 114.27          | 57.97      | 34.42     | C $\gamma$ 28.09, C $\delta$ 43.31, N $\eta_2$ 108.79                     |
| <b>Leu 5</b>              | NA              | 53.76      | 46.89     | C $\gamma$ 31.83, C $\delta$ 25.70, 24.71                                 |
| <b>Phe 6</b>              | 114.24          | 60.05      | 36.78     |                                                                           |
| <b>Ala 7</b>              | 123.92          | 53.92      | 20.54     |                                                                           |
| <b>Asp 8</b>              | 118.95          | 52.05      | 39.51     |                                                                           |
| <b>Gln 9</b>              | 114.39          | 59.38      | 29.57     | C $\gamma$ 34.63, N $\epsilon$ 108.24                                     |
| <b>Leu 10</b>             | 110.45          | 56.22      | 45.10     | C $\delta$ 25.31, 24.85                                                   |
| <b>Val 11</b>             | 111.10          | 60.14      | 35.01     | C $\gamma$ 18.56, 16.22                                                   |
| <b>Gly 12</b>             | 115.58          | 44.17      |           |                                                                           |
| <b>Arg 13</b>             | 119.20          | 54.35      | 33.20     | C $\gamma$ 27.81, C $\delta$ 43.81, N $\eta_2$ 110.32                     |
| <b>Arg 14</b>             | NA              | NA         | 33.75     | C $\gamma$ 27.25, C $\delta$ 44.29, N $\eta_2$ 109.33                     |
| <b>Asn 15</b>             | 115.56          | 52.02      | 41.47     | N $\delta$ 109.72                                                         |
| <b>Ile 16<sup>b</sup></b> | NA              | 60.86      | 39.11     | C $\gamma$ 28.17, C $\gamma'$ 18.20, C $\delta$ 14.31, C $\epsilon$ 54.82 |

<sup>a</sup>NA = not assigned. Due to spectral overlap, a chemical shift could not be definitively assigned to the C $\alpha$  of Arg14 and the amide N of Arg3, Leu5, Arg14 or Ile16. <sup>b</sup>Carboxy group of Ile is methylated (C $\epsilon$ ).

**Table S5 related to structure calculations.** Structural statistics of the solution structure of lassomycin

| Structural statistics         |             |
|-------------------------------|-------------|
| Distance and angle restraints |             |
| total cross peak assignments  | 449         |
| short ( $ i-j  \leq 1$ )      | 369         |
| medium ( $1 <  i-j  < 5$ )    | 19          |
| long ( $ i-j  \geq 5$ )       | 61          |
| number of $\phi$ angles       | 1           |
| Average target function value | 0.01        |
| rmsd (Å) for residues 1-16    |             |
| backbone                      | 0.35 ± 0.10 |
| heavy atoms                   | 1.00 ± 0.23 |

## References

- Farrow, N.A., Muhandiram, R., Singer, A.U., Pascal, S.M., Kay, C.M., Gish, G., Shoelson, S.E., Pawson, T., Forman-Kay, J.D., and Kay, L.E. (1994). Backbone dynamics of a free and phosphopeptide-complexed Src homology 2 domain studied by  $^{15}\text{N}$  NMR relaxation. *Biochem.* **33**, 5984-6003.
- Grzesiek, S., and Bax, A. (1992). Improved 3D triple-resonance NMR techniques applied to a 31 kDa protein. *J. Mag. Reson. Im.* **96**, 432-440.
- Ikura, M., Kay, L.E., and Bax, A. (1990). A novel approach for sequential assignment of H-1, C-13, and N-15 spectra of larger proteins: heteronuclear triple-resonance three-dimensional NMR spectroscopy. Application to calmodulin. *Biochem.* **29**, 4659-4667.
- Kay, L.E., Keifer, P., and Saarinen, T. (1992). Pure absorption gradient enhanced heteronuclear single quantum correlation spectroscopy with improved sensitivity. *J. Am. Chem. Soc.* **114**, 10663-10665.
- Kay, L.E., Xu, G.Y., and Yamazaki, T. (1994). Enhanced-sensitivity triple-resonance spectroscopy with minimal  $\text{H}_2\text{O}$  saturation. *J. Magn. Reson. Ser. A* **109**, 129-133.
- Kuboniwa, H., Grzesiek, S., Delaglio, F., and Bax, A. (1994). Measurement of HN-H alpha J couplings in calcium-free calmodulin using new 2D and 3D water-flip-back methods. *J. Biomol. NMR* **4**, 871-878.
- Muhandiram, D.R., and Kay, L.E. (1994). Gradient enhanced triple resonance three-dimensional NMR experiments with improved sensitivity. *J. Magn. Reson. Ser. B* **103**, 203-216.
- Sattler, M., Schwendinger, M.G., Schleucher, J., and Griesinger, C. (1995). Novel strategies for sensitivity enhancement in heteronuclear multidimensional NMR experiments employing pulsed-field gradients. *J. Biomol. NMR* **6**, 11-22.
- Vuister, G.W., and Bax, A. (1993). Quantitative J correlation: a new approach for measuring homonuclear three-Bond J(HNH.alpha.) coupling constants in  $^{15}\text{N}$ -enriched proteins. *J. Am. Chem. Soc.* **115**, 7772-7777.
- Wittekind, M., and Mueller, L. (1993). HNCACB, a high-sensitivity 3D NMR experiment to correlate amide-proton and nitrogen resonances with the alpha-carbon and beta-carbon resonances in proteins. *J. Magn. Reson. Ser. B* **101**, 201-205.
- Zhang, O.W., Kay, L.E., Olivier, J.P., and Forman-Kay, J.D. (1994). Backbone  $^1\text{H}$  and  $^{15}\text{N}$  resonance assignments of the N-terminal SH3 domain of drk in folded and unfolded states using enhanced-sensitivity pulsed-field gradient NMR techniques. *J. Biomol. NMR* **4**, 845-858.
